# Supplementary material for: Asymmetric supercapacitor based on an α-MoO3 cathode and porous activated carbon anode materials
Source: Royal Society of Chemistry journal article supplement (doi:10.1039/c5ra03579a), 2015-01-01
Supplement: c5ra03579a1.pdf [file c5ra03579a1.pdf]

## Supplementary Information

### Asymmetric supercapacitor based on $\alpha$ -MoO<sub>3</sub> cathode and porous activated carbon anode materials

F. Barzegar<sup>a</sup>, A. Bello<sup>a</sup>, D. Y. Momodu<sup>a</sup>, J. K. Dangbegnon<sup>a</sup>, F. Taghizadeh<sup>a</sup>, M.J. Madito<sup>a</sup>, T.M. Masikhwa<sup>a</sup> and N. Manyala<sup>a\*</sup>

<sup>a</sup>Department of Physics, Institute of Applied Materials, SARCHI Chair in Carbon Technology and Materials, University of Pretoria, Pretoria 0028, South Africa.

\***Email address:** nholu.manyala@up.ac.za (N. Manyala)

**Corresponding author** Tel: +27 (0)12 420 3549, Fax: +27 (0)12 420 2516

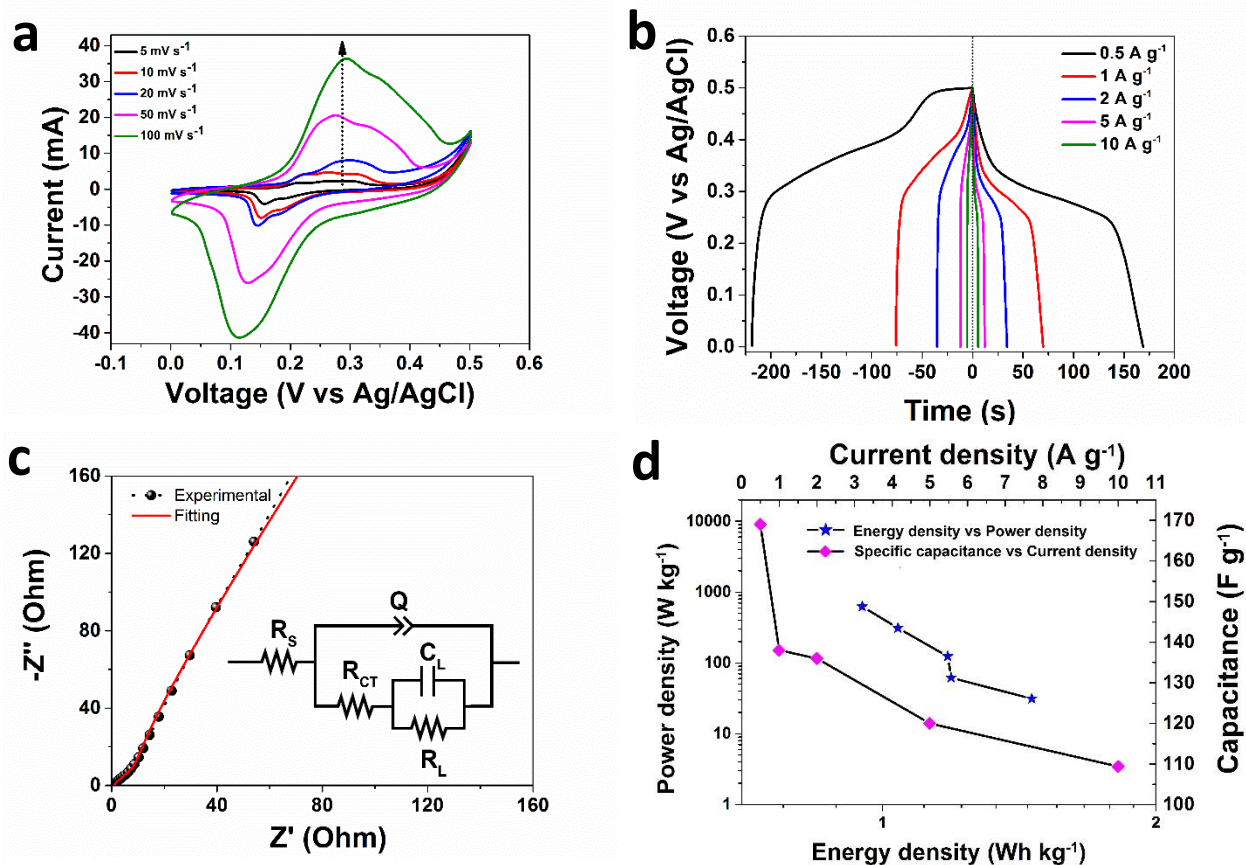

Figure S1. (a) CV curves of  $\alpha$ -MoO<sub>3</sub> at scan rates of 5 to 100 m V s<sup>-1</sup>, (b) The galvanostatic charge/discharge curves of  $\alpha$ -MoO<sub>3</sub> from 0.5 to 10 A g<sup>-1</sup>, (c) EIS plot and fitting curve for single electrode with the inset to the figure being equivalent circuit used for fitting the data of the  $\alpha$ -MoO<sub>3</sub> and (d) Ragone plot and the specific capacitance as function of the current density of  $\alpha$ -MoO<sub>3</sub>

Table S1 Fitting parameters for the single electrode of  $\alpha$ -MoO<sub>3</sub>

| $R_s$<br>( $\Omega$ ) | $Q$<br>( $F \cdot s^{a-1}$ ) | $n$ | $R_{CT}$<br>( $\Omega$ ) | $C_L$<br>(F) | $R_L$<br>( $\Omega$ ) |
|-----------------------|------------------------------|-----|--------------------------|--------------|-----------------------|
| 0.8                   | 0.013                        | 0.7 | 32                       | 5.34 e-3     | 800                   |

$X^2 = 0.016$      $X/\sqrt{N} = 0.021$      $CPE \equiv Q$

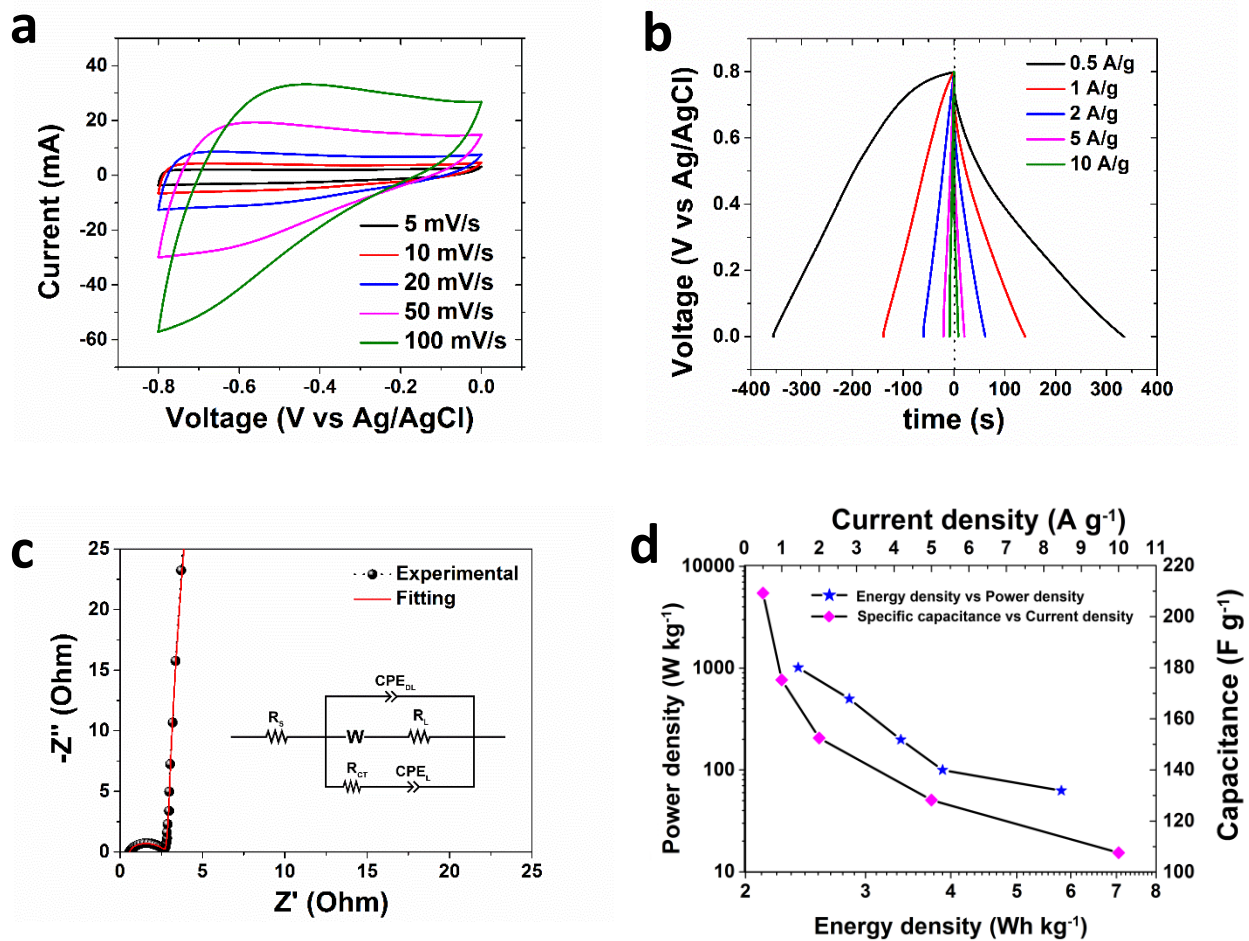

Figure S2. (a) CV curves of AC at scan rates of from 5 to 100 m Vs<sup>-1</sup>, (b) The galvanostatic charge/discharge curves of AC from 0.5 to 10 A g<sup>-1</sup>, (c) EIS plot and fitting curve for single electrode with the inset to the figure being equivalent circuit used for fitting the data of the AC and (d) Ragone plot and the specific capacitance as function of the current density of AC

Table S2 Fitting parameters for the single electrode of AC

| <b>R<sub>S</sub></b><br>( <b>Ω</b> ) | <b>Q<sub>DL</sub></b><br>( <b>F.s<sup>a-1</sup></b> ) | <b>a<sub>DL</sub></b> | <b>A<sub>w</sub></b><br>( <b>Ω.s<sup>-0.5</sup></b> ) | <b>R<sub>L</sub></b><br>( <b>Ω</b> ) | <b>R<sub>CT</sub></b><br>( <b>Ω</b> ) | <b>Q<sub>L</sub></b><br>( <b>F.s<sup>a-1</sup></b> ) | <b>a<sub>L</sub></b> |
|--------------------------------------|-------------------------------------------------------|-----------------------|-------------------------------------------------------|--------------------------------------|---------------------------------------|------------------------------------------------------|----------------------|
| <b>0.596</b>                         | <b>0.0002</b>                                         | <b>1</b>              | <b>75.34</b>                                          | <b>0.413</b>                         | <b>2.314</b>                          | <b>0.433</b>                                         | <b>1</b>             |

$X^2 = 0.4$        $X/\sqrt{N} = 0.1$        $CPE_{DL} \equiv Q_{DL}$      $CPE_L \equiv Q_L$        $a_{DL} \equiv a_L \equiv n$
